# Supplementary material for: Global Gene Expression Profiling of Human Osteosarcomas Reveals Metastasis-Associated Chemokine Pattern
Source: PubMed Central journal article supplement (PMC3324929; doi:10.1155/2012/639038), 2012-02-28

Supplementary Table 1. Top-210 genes differentially expressed between primary tumours that did and did not develop into metastasis by SAM analysis (Namløs et al.)

| Number | Gene_Symbol | Gene_Name                                                                                      | Primary_Gene_ID | Entrez Gene ID | Celera Gene ID | UniGene ID          | d[]    | de[]   | Delta[] | FSN[] | FDR[]  | Fold Change | q-val[] |
|--------|-------------|------------------------------------------------------------------------------------------------|-----------------|----------------|----------------|---------------------|--------|--------|---------|-------|--------|-------------|---------|
| 1      | LOC284454   | null                                                                                           | 284454          | 284454         | hCG2001068     | Hs.436426           | 4.918  | 3.649  | 1.269   | 0     | 0      | 3.528       | 0       |
| 2      | CXCL2       | chemokine (C-X-C motif) ligand 2                                                               | 2920            | 2920           | hCG16361.2     | Hs.75765            | 4.559  | 3.376  | 1.183   | 0     | 0      | 13.114      | 0       |
| 3      | PTGS2       | prostaglandin-endoperoxide synthase 2 (prostaglandin G/H synthase and cyclooxygenase)          | 5743            | 5743           | hCG39885.3     | Hs.196384           | 4.337  | 3.234  | 1.103   | 0     | 0      | 7.841       | 0       |
| 4      | FOXF1       | forkhead box F1                                                                                | 2294            | 2294           | hCG17050.2     | Hs.155591           | 4.155  | 3.142  | 1.014   | 0     | 0      | 9.416       | 0       |
| 5      | RNMTL1      | RNA methyltransferase like 1                                                                   | 55178           | 55178          | hCG32500.2     | Hs.182729           | -4.119 | -3.647 | 0.472   | 0     | 0      | -1.969      | 0       |
| 6      | SLC2A3      | solute carrier family 2 (facilitated glucose transporter), member 3                            | 6515            | 6515           | hCG22218.2     | Hs.419240           | 4.074  | 3.067  | 1.007   | 0     | 0      | 3.912       | 0       |
| 7      | SLC2A14     | solute carrier family 2 (facilitated glucose transporter), member 14                           | 144195          | 144195         | hCG1730826.1   | Hs.210227           | 4.07   | 3.015  | 1.055   | 0     | 0      | 2.681       | 0       |
| 8      | SCGB1A1     | secretoglobin, family 1A, member 1 (uteroglobin)                                               | 7356            | 7356           | hCG39843.2     | Hs.523732           | 3.999  | 2.965  | 1.035   | 0     | 0      | 11.506      | 0       |
| 9      | KRT19       | keratin 19                                                                                     | 3880            | 3880           | hCG2043341     | Hs.514167           | 3.976  | 2.921  | 1.056   | 0     | 0      | 5.473       | 0       |
| 10     | IL8         | interleukin 8                                                                                  | 3576            | 3576           | hCG16372.3     | Hs.624              | 3.9    | 2.884  | 1.016   | 0     | 0      | 6.508       | 0       |
| 11     | HOP         | null                                                                                           | 84525           | 84525          | null           | Hs.121443           | 3.857  | 2.852  | 1.005   | 0     | 0      | 6.389       | 0       |
| 12     | SUSD4       | sushi domain containing 4                                                                      | 55061           | 55061          | hCG23752.3     | Hs.497841           | -3.778 | -3.394 | 0.384   | 0.914 | 7.616  | -4.155      | 6.093   |
| 13     | NR4A1       | nuclear receptor subfamily 4, group A, member 1                                                | 3164            | 3164           | hCG37966.3     | Hs.524430           | 3.769  | 2.824  | 0.945   | 0.914 | 7.03   | 4.888       | 4.81    |
| 14     | EGR1        | early growth response 1                                                                        | 1958            | 1958           | hCG18777.1     | Hs.326035           | 3.748  | 2.797  | 0.95    | 0.914 | 6.528  | 4.201       | 4.81    |
| 15     | PRDM5       | PR domain containing 5                                                                         | 11107           | 11107          | hCG38692.3     | Hs.132593           | -3.739 | -3.239 | 0.499   | 0.914 | 6.093  | -2.266      | 6.093   |
| 16     | SERPINA1    | serpin peptidase inhibitor, clade A (alpha-1 antitrypsinase, antitrypsin), member 1            | 5265            | 5265           | hCG2029168.1   | Hs.525557           | 3.705  | 2.772  | 0.933   | 0.914 | 5.712  | 6.586       | 4.81    |
| 17     | C4BPA       | complement component 4 binding protein, alpha                                                  | 722             | 722            | hCG1986997     | Hs.1012             | 3.664  | 2.748  | 0.916   | 0.914 | 5.376  | 13.41       | 4.81    |
| 18     | SFTPD       | surfactant, pulmonary-associated protein D                                                     | 6441            | 6441           | hCG1993456     | Hs.253495           | 3.601  | 2.729  | 0.872   | 0.914 | 5.077  | 17.991      | 4.81    |
| 19     | EGR2        | early growth response 2 (Krox-20 homolog, Drosophila)                                          | 1959            | 1959           | hCG40234.2     | Hs.1395             | 3.59   | 2.709  | 0.882   | 0.914 | 4.81   | 4.577       | 4.81    |
| 20     | LOC253970   | null                                                                                           | 253970          | 253970         | hCG2013488     | Hs.509165           | 3.531  | 2.691  | 0.84    | 1.828 | 9.139  | 12.973      | 7.311   |
| 21     | NR4A2       | nuclear receptor subfamily 4, group A, member 2                                                | 4929            | 4929           | hCG38357.2     | Hs.165258           | 3.513  | 2.674  | 0.84    | 1.828 | 8.704  | 5.224       | 7.311   |
| 22     | null        | null                                                                                           | hCG1995976      | null           | hCG1995976     | Hs.313856           | -3.498 | -3.137 | 0.36    | 1.828 | 8.308  | -1.91       | 7.616   |
| 23     | SFTPC       | surfactant, pulmonary-associated protein C                                                     | 6440            | 6440           | hCG23794.3     | Hs.1074             | 3.463  | 2.658  | 0.806   | 1.828 | 7.947  | 43.804      | 7.311   |
| 24     | FLJ13611    | null                                                                                           | 80006           | 80006          | hCG16824.4     | Hs.482301           | -3.457 | -3.064 | 0.393   | 1.828 | 7.616  | -1.756      | 7.616   |
| 25     | SFTPA2      | surfactant, pulmonary-associated protein A2                                                    | 6436            | 6436           | hCG2025158     | Hs.464987           | 3.417  | 2.643  | 0.774   | 1.828 | 7.311  | 26.604      | 7.311   |
| 26     | WDR45       | WD repeat domain 45                                                                            | 11152           | 11152          | hCG1986580     | Hs.156701           | -3.396 | -3.004 | 0.393   | 2.742 | 10.545 | -1.763      | 10.545  |
| 27     | null        | null                                                                                           | hCG1787594.2    | null           | hCG1787594.2   | Hs.235795 Hs.570761 | 3.393  | 2.627  | 0.766   | 2.742 | 10.154 | 2.048       | 8.844   |
| 28     | NGFRAP1L1   | NGFRAP1-like 1                                                                                 | 340542          | 340542         | hCG1642311.3   | Hs.47209            | 3.38   | 2.614  | 0.766   | 2.742 | 9.792  | 4.566       | 8.844   |
| 29     | CTSE        | cathepsin E                                                                                    | 1510            | 1510           | hCG18377.2     | Hs.1355             | 3.38   | 2.602  | 0.778   | 2.742 | 9.454  | 7.118       | 8.844   |
| 30     | SFTPB       | surfactant, pulmonary-associated protein B                                                     | 6439            | 6439           | hCG34600.3     | Hs.512690           | 3.377  | 2.588  | 0.79    | 2.742 | 9.139  | 11.346      | 8.844   |
| 31     | PCMTD1      | protein-L-isoaspartate (D-aspartate) O-methyltransferase domain containing 1                   | 115294          | 115294         | hCG27079.3     | Hs.308480           | 3.351  | 2.577  | 0.775   | 2.742 | 8.844  | 1.684       | 8.844   |
| 32     | EHMT2       | euchromatic histone-lysine N-methyltransferase 2                                               | 10919           | 10919          | hCG1811586.1   | Hs.520038           | -3.319 | -2.96  | 0.359   | 3.656 | 11.424 | -2.715      | 11.424  |
| 33     | IL1B        | interleukin 1, beta                                                                            | 3553            | 3553           | hCG16263.2     | Hs.126256           | 3.264  | 2.564  | 0.7     | 3.656 | 11.077 | 3.736       | 11.077  |
| 34     | FOS         | v-fos FBJ murine osteosarcoma viral oncogene homolog                                           | 2353            | 2353           | hCG22355.3     | Hs.568953 Hs.25647  | 3.254  | 2.553  | 0.7     | 4.569 | 13.44  | 4.863       | 11.424  |
| 35     | CXCL3       | chemokine (C-X-C motif) ligand 3                                                               | 2921            | 2921           | hCG16366.3     | Hs.89690            | 3.25   | 2.542  | 0.708   | 4.569 | 13.056 | 6.875       | 11.424  |
| 36     | MLLT4       | myeloid/lymphoid or mixed-lineage leukemia (trithorax homolog, Drosophila); translocated to, 4 | 4301            | 4301           | hCG2041523     | Hs.448059           | 3.214  | 2.532  | 0.682   | 4.569 | 12.693 | 1.965       | 11.424  |
| 37     | MGC17299    | null                                                                                           | 128218          | 128218         | hCG1644000.4   | Hs.104476           | 3.211  | 2.522  | 0.689   | 4.569 | 12.63  | 3.67        | 11.424  |
| 38     | FLJ21125    | null                                                                                           | 79680           | 79680          | hCG2002279.1   | Hs.105642           | 3.199  | 2.511  | 0.687   | 4.569 | 12.025 | 1.612       | 11.424  |
| 39     | MGC16943    | null                                                                                           | 112479          | 112479         | hCG38246.3     | Hs.248437           | -3.195 | -2.918 | 0.276   | 4.569 | 11.717 | -2.408      | 11.717  |
| 40     | SPINT2      | serine peptidase inhibitor, Kunitz type, 2                                                     | 10653           | 10653          | hCG42856.3     | Hs.31439            | 3.194  | 2.502  | 0.692   | 4.569 | 11.424 | 3.365       | 11.424  |
| 41     | RDHE2       | null                                                                                           | 195814          | 195814         | hCG1787435.2   | Hs.170673           | 3.188  | 2.493  | 0.695   | 5.483 | 13.374 | 6.131       | 12.462  |
| 42     | LOC401431   | null                                                                                           | 401431          | 401431         | null           | Hs.556097           | -3.179 | -2.885 | 0.295   | 5.483 | 13.056 | -2.553      | 12.752  |
| 43     | null        | null                                                                                           | hCG1801741.2    | null           | hCG1801741.2   | null                | -3.156 | -2.852 | 0.304   | 5.483 | 12.752 | -2.66       | 12.752  |
| 44     | AQP4        | aquaporin 4                                                                                    | 361             | 361            | hCG37174.3     | Hs.315369           | 3.147  | 2.484  | 0.663   | 5.483 | 12.462 | 8.626       | 12.462  |
| 45     | BOC         | null                                                                                           | 91653           | 91653          | hCG17534.2     | Hs.556004           | -3.129 | -2.822 | 0.307   | 6.397 | 14.216 | -1.776      | 13.056  |
| 46     | CYP2B6      | cytochrome P450, family 2, subfamily B, polypeptide 6                                          | 1555            | 1555           | hCG1995522     | Hs.1360             | 3.124  | 2.475  | 0.65    | 6.397 | 13.907 | 4.09        | 12.544  |
| 47     | KIAA0703    | null                                                                                           | 9914            | 9914           | hCG39788.3     | Hs.6168             | 3.119  | 2.466  | 0.653   | 6.397 | 13.611 | 3.794       | 12.544  |
| 48     | DSP         | desmoplakin                                                                                    | 1832            | 1832           | hCG14677.2     | Hs.519873           | 3.115  | 2.458  | 0.657   | 6.397 | 13.328 | 4.321       | 12.544  |
| 49     | CYP4B1      | cytochrome P450, family 4, subfamily B, polypeptide 1                                          | 1580            | 1580           | hCG22100.5     | Hs.436317           | 3.109  | 2.45   | 0.658   | 6.397 | 13.056 | 11.308      | 12.544  |
| 50     | BAIAP2L1    | BAI1-associated protein 2-like 1                                                               | 55971           | 55971          | hCG41326.4     | Hs.567541           | 3.107  | 2.443  | 0.663   | 6.397 | 12.794 | 5.009       | 12.544  |
| 51     | CXCL5       | chemokine (C-X-C motif) ligand 5                                                               | 6374            | 6374           | hCG16364.3     | Hs.89714            | 3.106  | 2.436  | 0.67    | 6.397 | 12.544 | 3.034       | 12.544  |
| 52     | KIAA1799    | null                                                                                           | 84455           | 84455          | hCG23452.4     | Hs.269768           | -3.1   | -2.796 | 0.304   | 7.311 | 14.06  | -1.769      | 13.056  |
| 53     | SGK         | serum/glucocorticoid regulated kinase                                                          | 6446            | 6446           | hCG32737.3     | Hs.510078           | 3.083  | 2.428  | 0.655   | 7.311 | 13.795 | 2.573       | 13.293  |
| 54     | null        | null                                                                                           | hCG1643044.2    | null           | hCG1643044.2   | Hs.128395 Hs.356460 | -3.076 | -2.773 | 0.303   | 7.311 | 13.539 | -2.403      | 13.056  |
| 55     | IL6         | interleukin 6 (interferon, beta 2)                                                             | 3569            | 3569           | hCG38231.4     | Hs.512234           | 3.066  | 2.42   | 0.646   | 7.311 | 13.293 | 6.385       | 13.293  |
| 56     | VARSL       | valyl-tRNA synthetase like                                                                     | 57176           | 57176          | hCG1788592.2   | Hs.102910           | -3.065 | -2.751 | 0.314   | 7.311 | 13.056 | -2.06       | 13.056  |
| 57     | TRIM23      | tripartite motif-containing 23                                                                 | 373             | 373            | hCG17860.4     | Hs.567237           | -3.062 | -2.73  | 0.332   | 8.225 | 14.43  | -1.608      | 14.06   |
| 58     | null        | null                                                                                           | hCG2037001      | null           | hCG2037001     | null                | 3.056  | 2.413  | 0.643   | 8.225 | 14.181 | 3.682       | 13.484  |
| 59     | OSM         | oncostatin M                                                                                   | 5008            | 5008           | hCG41316.3     | Hs.248156           | 3.042  | 2.406  | 0.637   | 8.225 | 13.941 | 2.487       | 13.484  |
| 60     | null        | null                                                                                           | hCG2041353      | null           | hCG2041353     | null                | 3.037  | 2.399  | 0.638   | 8.225 | 13.708 | 1.964       | 13.484  |
| 61     | SNF1LK      | SNF1-like kinase                                                                               | 150094          | 150094         | hCG401294.2    | Hs.282113           | 3.037  | 2.392  | 0.644   | 8.225 | 13.484 | 3.292       | 13.484  |
| 62     | OR6K3       | olfactory receptor, family 6, subfamily K, member 3                                            | 391114          | 391114         | hCG1645091.2   | null                | 3.022  | 2.386  | 0.636   | 9.139 | 14.74  | 2.384       | 14.28   |
| 63     | ATF3        | activating transcription factor 3                                                              | 467             | 467            | hCG37734.3     | Hs.460              | 3.018  | 2.38   | 0.639   | 9.139 | 14.506 | 3.171       | 14.28   |

|     |               |                                                                                   |              |                     |                     |        |        |       |        |        |        |        |
|-----|---------------|-----------------------------------------------------------------------------------|--------------|---------------------|---------------------|--------|--------|-------|--------|--------|--------|--------|
| 64  | RGS2          | regulator of G-protein signalling 2, 24kDa                                        | 5997         | 5997 hCG41052.3     | Hs.78944            | 3.017  | 2.372  | 0.645 | 9.139  | 14.28  | 3.436  | 14.28  |
| 65  | NKD1          | naked cuticle homolog 1 (Drosophila)                                              | 85407        | 85407 hCG24311.2    | Hs.298434           | -3.01  | -2.711 | 0.3   | 9.139  | 14.06  | -2.097 | 14.06  |
| 66  | DENND3        | DENNM/MADD domain containing 3                                                    | 22898        | 22898 hCG20740.4    | Hs.18166            | 3.006  | 2.366  | 0.641 | 10.053 | 15.232 | 2.297  | 14.569 |
| 67  | ABCC3         | ATP-binding cassette, sub-family C (CFTR/MRP), member 3                           | 8714         | 8714 hCG29634.3     | Hs.463421           | 3.006  | 2.36   | 0.646 | 10.053 | 15.004 | 3.337  | 14.569 |
| 68  | CLDN4         | claudin 4                                                                         | 1364         | 1364 null           | Hs.520942           | 2.998  | 2.354  | 0.644 | 10.053 | 14.784 | 2.277  | 14.569 |
| 69  | null          | null                                                                              | hCG1820954.2 | null                | null                | 2.983  | 2.348  | 0.634 | 10.053 | 14.569 | 2.771  | 14.569 |
| 70  | TMC5          | transmembrane channel-like 5                                                      | 79838        | 79838 hCG38022.3    | Hs.115838           | 2.976  | 2.342  | 0.634 | 10.967 | 15.667 | 4.127  | 15.446 |
| 71  | FGFR4         | fibroblast growth factor receptor 4                                               | 2264         | 2264 hCG1821375.1   | Hs.165950           | 2.963  | 2.337  | 0.626 | 10.967 | 15.446 | 1.915  | 15.446 |
| 72  | ST7L          | suppression of tumorigenicity 7 like                                              | 54879        | 54879 hCG38462.3    | Hs.201921           | -2.962 | -2.692 | 0.269 | 11.881 | 16.501 | -2.032 | 15.429 |
| 73  | C9orf58       | chromosome 9 open reading frame 58                                                | 83543        | 83543 hCG30196.2    | Hs.4944             | -2.962 | -2.675 | 0.286 | 11.881 | 16.275 | -4.931 | 15.429 |
| 74  | UROD          | uroporphyrinogen decarboxylase                                                    | 7389         | 7389 hCG17844.2     | Hs.78601            | -2.958 | -2.658 | 0.3   | 11.881 | 16.055 | -1.712 | 15.429 |
| 75  | ARMC5         | armadillo repeat containing 5                                                     | 79798        | 79798 hCG1772019.3  | Hs.121915           | -2.954 | -2.642 | 0.312 | 11.881 | 15.841 | -1.694 | 15.429 |
| 76  | null          | null                                                                              | ABI408610    | null                | null                | 2.95   | 2.331  | 0.618 | 11.881 | 15.632 | 1.918  | 15.632 |
| 77  | ZBTB17        | zinc finger and BTB domain containing 17                                          | 7709         | 7709 hCG25370.3     | Hs.433764           | -2.945 | -2.628 | 0.317 | 11.881 | 15.429 | -1.64  | 15.429 |
| 78  | FLJ21839      | null                                                                              | 60509        | 60509 hCG1990058    | Hs.138207           | -2.93  | -2.614 | 0.316 | 12.794 | 16.403 | -1.772 | 16.403 |
| 79  | null          | null                                                                              | hCG1640549.4 | null                | null                | 2.929  | 2.326  | 0.603 | 12.794 | 16.196 | 4.124  | 15.993 |
| 80  | S100A9        | S100 calcium binding protein A9 (calgranulin B)                                   | 6280         | 6280 hCG15465.3     | Hs.112405           | 2.928  | 2.32   | 0.608 | 12.794 | 15.993 | 4.007  | 15.993 |
| 81  | null          | null                                                                              | hCG1818462.1 | null                | null                | 2.899  | 2.315  | 0.584 | 14.622 | 18.052 | 2.596  | 16.696 |
| 82  | SFTPG         | surfactant associated protein G                                                   | 389376       | 389376 hCG2006673   | Hs.211267           | 2.896  | 2.309  | 0.586 | 14.622 | 17.832 | 5.46   | 16.696 |
| 83  | null          | null                                                                              | hCG1790588.2 | null                | null                | -2.896 | -2.601 | 0.294 | 14.622 | 17.617 | -2.321 | 16.858 |
| 84  | LOC92270      | null                                                                              | 92270        | 92270 hCG1641198.2  | Hs.364045           | -2.895 | -2.588 | 0.307 | 14.622 | 17.407 | -2.262 | 16.858 |
| 85  | RGC32         | null                                                                              | 28984        | 28984 hCG32189.3    | Hs.507866           | 2.893  | 2.305  | 0.589 | 14.622 | 17.203 | 2.875  | 16.696 |
| 86  | null          | null                                                                              | hCG2000660   | null                | Hs.569727           | -2.886 | -2.575 | 0.31  | 14.622 | 17.003 | -2.113 | 16.858 |
| 87  | EIF1AY        | eukaryotic translation initiation factor 1A, Y-linked                             | 9086         | 9086 hCG37922.4     | Hs.584171 Hs.461178 | 2.884  | 2.299  | 0.585 | 14.622 | 16.807 | 10.888 | 16.696 |
| 88  | KPTN          | kaptn (actin binding protein)                                                     | 11133        | 11133 hCG20550.3    | Hs.25441            | -2.88  | -2.563 | 0.317 | 15.536 | 17.655 | -1.757 | 16.858 |
| 89  | TOB1          | transducer of ERBB2, 1                                                            | 10140        | 10140 hCG1639758.3  | Hs.531550           | 2.878  | 2.295  | 0.584 | 15.536 | 17.456 | 1.85   | 16.696 |
| 90  | SKIV2L2       | superkiller viralicidic activity 2-like 2 (S. cerevisiae)                         | 23517        | 23517 hCG40991.3    | Hs.274531           | -2.877 | -2.552 | 0.325 | 15.536 | 17.262 | -1.554 | 16.858 |
| 91  | null          | null                                                                              | hCG2042709   | null                | Hs.530461           | -2.874 | -2.541 | 0.333 | 15.536 | 17.073 | -2.217 | 16.858 |
| 92  | DKFZp781N1041 | null                                                                              | 387712       | 387712 null         | Hs.372457           | 2.863  | 2.29   | 0.573 | 15.536 | 16.887 | 2.507  | 16.696 |
| 93  | null          | null                                                                              | hCG1993095.1 | null                | Hs.1993095.1        | 2.858  | 2.285  | 0.573 | 16.45  | 17.688 | 3.554  | 16.696 |
| 94  | null          | null                                                                              | hCG2042092   | null                | null                | 2.853  | 2.281  | 0.573 | 16.45  | 17.5   | 1.544  | 16.696 |
| 95  | TUFM          | Tu translation elongation factor, mitochondrial                                   | 7284         | 7284 hCG1747191.2   | Hs.12084            | -2.85  | -2.529 | 0.321 | 16.45  | 17.316 | -1.755 | 16.858 |
| 96  | MAL2          | mal, T-cell differentiation protein 2                                             | 114569       | 114569 hCG1653390.2 | Hs.201083           | 2.848  | 2.276  | 0.572 | 17.364 | 18.087 | 5.943  | 16.696 |
| 97  | BAI2          | brain-specific angiogenesis inhibitor 2                                           | 576          | 576 hCG41602.3      | Hs.524138           | -2.847 | -2.518 | 0.328 | 17.364 | 17.901 | -3.149 | 16.858 |
| 98  | LCP2          | lymphocyte cytosolic protein 2 (SH2 domain containing leukocyte protein of 76kDa) | 3937         | 3937 hCG37753.3     | Hs.304475           | 2.846  | 2.271  | 0.575 | 17.364 | 17.718 | 2.654  | 16.696 |
| 99  | ROS1          | v-ros UR2 sarcoma virus oncogene homolog 1 (avian)                                | 6098         | 6098 hCG1811669.2   | Hs.1041             | 2.845  | 2.266  | 0.579 | 17.364 | 17.539 | 4.322  | 16.696 |
| 100 | THBS4         | thrombospondin 4                                                                  | 7060         | 7060 hCG2015975     | Hs.211426           | -2.843 | -2.508 | 0.335 | 17.364 | 17.364 | -7.001 | 16.858 |
| 101 | UNQ5810       | null                                                                              | 388218       | 388218 hCG1657150.4 | Hs.115838           | 2.839  | 2.261  | 0.577 | 17.364 | 17.192 | 4.269  | 16.696 |
| 102 | FLJ39660      | null                                                                              | 284992       | 284992 hCG2043053.1 | Hs.132519           | -2.834 | -2.499 | 0.335 | 17.364 | 17.023 | -2.309 | 16.858 |
| 103 | KIAA0372      | KIAA0372                                                                          | 9652         | 9652 hCG1811113.2   | Hs.482868           | -2.828 | -2.489 | 0.338 | 17.364 | 16.858 | -1.509 | 16.858 |
| 104 | GPRC5A        | G protein-coupled receptor, family C, group 5, member A                           | 9052         | 9052 hCG27693.3     | Hs.194691           | 2.827  | 2.257  | 0.57  | 17.364 | 16.696 | 4.316  | 16.696 |
| 105 | C14orf4       | chromosome 14 open reading frame 4                                                | 64207        | 64207 hCG21245.3    | Hs.179260           | 2.825  | 2.252  | 0.572 | 18.278 | 17.407 | 1.892  | 17.184 |
| 106 | null          | null                                                                              | hCG2040471   | null                | null                | 2.823  | 2.248  | 0.574 | 18.278 | 17.243 | 2.131  | 17.184 |
| 107 | DKFZp686E2433 | null                                                                              | 345462       | 345462 hCG2041603   | Hs.445740           | -2.811 | -2.48  | 0.331 | 19.192 | 17.936 | -1.718 | 17.135 |
| 108 | CEBPE         | CCAAT/enhancer binding protein (C/EBP), epsilon                                   | 1053         | 1053 hCG41750.2     | Hs.558308           | 2.809  | 2.244  | 0.566 | 19.192 | 17.77  | 1.553  | 17.184 |
| 109 | CAV2          | caveolin 2                                                                        | 858          | 858 hCG39087.4      | Hs.212332           | 2.808  | 2.239  | 0.569 | 19.192 | 17.607 | 2.324  | 17.184 |
| 110 | PON2          | paraoxonase 2                                                                     | 5445         | 5445 hCG1640820.2   | Hs.530077           | 2.806  | 2.235  | 0.57  | 19.192 | 17.447 | 1.693  | 17.184 |
| 111 | DDX3X         | DEAD (Asp-Glu-Ala-Asp) box polypeptide 3, X-linked                                | 1654         | 1654 hCG19318.3     | Hs.380774           | 2.801  | 2.231  | 0.57  | 19.192 | 17.29  | 2.131  | 17.184 |
| 112 | CDKL3         | cyclin-dependent kinase-like 3                                                    | 51265        | 51265 hCG1980962.1  | Hs.105818           | -2.8   | -2.471 | 0.329 | 19.192 | 17.135 | -1.922 | 17.135 |
| 113 | ZNF300        | zinc finger protein 300                                                           | 91975        | 91975 hCG1980728    | Hs.134885           | -2.796 | -2.462 | 0.333 | 20.106 | 17.793 | -2.462 | 17.793 |
| 114 | DUSP1         | dual specificity phosphatase 1                                                    | 1843         | 1843 hCG41245.2     | Hs.171695           | 2.793  | 2.227  | 0.566 | 20.106 | 17.637 | 2.83   | 17.184 |
| 115 | ABCA3         | ATP-binding cassette, sub-family A (ABC1), member 3                               | 21           | 21 hCG41022.5       | Hs.26630            | 2.791  | 2.223  | 0.568 | 20.106 | 17.483 | 5.183  | 17.184 |
| 116 | PEBP4         | null                                                                              | 157310       | 157310 hCG15999.3   | Hs.491242           | 2.79   | 2.219  | 0.571 | 20.106 | 17.332 | 4.073  | 17.184 |
| 117 | null          | null                                                                              | hCG1998836.1 | null                | null                | 2.788  | 2.215  | 0.573 | 20.106 | 17.184 | 1.506  | 17.184 |
| 118 | TYRP1         | tyrosinase-related protein 1                                                      | 7306         | 7306 hCG27256.4     | Hs.270279           | 2.781  | 2.211  | 0.571 | 21.02  | 17.813 | 3.868  | 17.663 |
| 119 | LPP           | LIM domain containing preferred translocation partner in lipoma                   | 4026         | 4026 hCG17155.3     | Hs.444362           | 2.772  | 2.207  | 0.565 | 21.02  | 17.663 | 1.718  | 17.663 |
| 120 | ANKRD32       | ankyrin repeat domain 32                                                          | 84250        | 84250 hCG2016110    | Hs.285055 Hs.482853 | -2.769 | -2.454 | 0.315 | 21.933 | 18.278 | -1.849 | 17.832 |
| 121 | null          | null                                                                              | hCG1817888.2 | null                | Hs.498939           | 2.766  | 2.203  | 0.564 | 21.933 | 18.127 | 1.394  | 17.688 |
| 122 | IDH3B         | isocitrate dehydrogenase 3 (NAD+) beta                                            | 3420         | 3420 hCG39616.3     | Hs.436405           | -2.765 | -2.446 | 0.32  | 21.933 | 17.978 | -1.733 | 17.832 |
| 123 | KIAA0649      | KIAA0649                                                                          | 9858         | 9858 hCG27241.3     | Hs.533260           | -2.759 | -2.438 | 0.321 | 21.933 | 17.832 | -1.901 | 17.832 |
| 124 | TREM1         | triggering receptor expressed on myeloid cells 1                                  | 54210        | 54210 hCG32869.2    | Hs.283022           | 2.758  | 2.199  | 0.559 | 21.933 | 17.688 | 6.164  | 17.688 |
| 125 | NR4A3         | nuclear receptor subfamily 4, group A, member 3                                   | 8013         | 8013 hCG28754.3     | Hs.279522           | 2.749  | 2.196  | 0.553 | 22.847 | 18.278 | 4.115  | 17.711 |
| 126 | ARF6          | ADP-ribosylation factor 6                                                         | 382          | 382 hCG2013574      | Hs.525330           | 2.746  | 2.192  | 0.554 | 22.847 | 18.133 | 1.728  | 17.711 |
| 127 | KIAA1772      | KIAA1772                                                                          | 80000        | 80000 hCG1811231.5  | Hs.54838            | -2.745 | -2.43  | 0.315 | 22.847 | 17.99  | -1.862 | 17.849 |
| 128 | ZNF228        | zinc finger protein 228                                                           | 7771         | 7771 hCG20223.4     | Hs.48589            | -2.744 | -2.423 | 0.322 | 22.847 | 17.849 | -1.639 | 17.849 |
| 129 | CLDN18        | claudin 18                                                                        | 51208        | 51208 hCG2022628    | Hs.240182           | 2.743  | 2.189  | 0.555 | 22.847 | 17.711 | 6.311  | 17.711 |

|                       |                                                                                           |              |                              |              |        |        |        |        |        |        |        |        |
|-----------------------|-------------------------------------------------------------------------------------------|--------------|------------------------------|--------------|--------|--------|--------|--------|--------|--------|--------|--------|
| 130 IL17D             | interleukin 17D                                                                           | 53342        | 53342 hCG31110.3             | Hs.130652    | -2.741 | -2.415 | 0.326  | 23.761 | 18.278 | -3.281 | 18.001 |        |
| 131 null              | null                                                                                      | hCG2040182   | null                         | hCG2040182   | null   | 2.738  | 2.185  | 0.553  | 23.761 | 18.138 | 1.595  | 18.138 |
| 132 FAM40A            | family with sequence similarity 40, member A                                              | 85369        | 85369 hCG40257.3             | Hs.169577    | -2.738 | -2.409 | 0.329  | 23.761 | 18.001 | -1.467 | 18.001 |        |
| 133 LOC92659          | null                                                                                      | 92659        | 92659 hCG1987587             | Hs.336958    | -2.73  | -2.401 | 0.328  | 24.675 | 18.553 | -2.365 | 18.543 |        |
| 134 FOSB              | FBJ murine osteosarcoma viral oncogene homolog B                                          | 2354         | 2354 hCG20725.3              | Hs.75678     | 2.726  | 2.182  | 0.544  | 24.675 | 18.414 | 2.514  | 18.414 |        |
| 135 null              | null                                                                                      | hCG2041761   | null                         | hCG2041761   | null   | 2.716  | 2.178  | 0.538  | 25.589 | 18.955 | 2.015  | 18.815 |
| 136 RPS4Y1            | ribosomal protein S4, Y-linked 1                                                          | 6192         | 6192 hCG1988058              | Hs.282376    | 2.715  | 2.174  | 0.54   | 25.589 | 18.815 | 46.164 | 18.815 |        |
| 137 null              | null                                                                                      | hCG1640591.2 | null                         | hCG1640591.2 | null   | -2.714 | -2.394 | 0.32   | 25.589 | 18.678 | -1.763 | 18.543 |
| 138 TGIF2             | TGFB-induced factor 2 (TALE family homeobox)                                              | 60436        | 60436 hCG31789.3             | Hs.292281    | -2.714 | -2.387 | 0.327  | 25.589 | 18.543 | -1.725 | 18.543 |        |
| 139 BRD8              | bromodomain containing 8                                                                  | 10902        | 10902 hCG39941.2             | Hs.519337    | -2.703 | -2.38  | 0.323  | 26.503 | 19.067 | -1.711 | 18.887 |        |
| 140 RBM35B            | RNA binding motif protein 35B                                                             | 80004        | 80004 hCG28119.2             | Hs.436585    | 2.702  | 2.171  | 0.532  | 27.417 | 19.583 | 4.748  | 18.99  |        |
| 141 MMP7              | matrix metalloproteinase 7 (matrilysin, uterine)                                          | 4316         | 4316 hCG1640914.2            | Hs.2256      | 2.699  | 2.167  | 0.532  | 27.417 | 19.445 | 5.138  | 18.99  |        |
| 142 TACSTD2           | tumor-associated calcium signal transducer 2                                              | 4070         | 4070 hCG22165.2              | Hs.23582     | 2.696  | 2.164  | 0.532  | 27.417 | 19.308 | 4.867  | 18.99  |        |
| 143 TNFRSF10D         | tumor necrosis factor receptor superfamily, member 10d, decoy with truncated death domain | 8793         | 8793 hCG1645071.3            | Hs.213467    | 2.692  | 2.16   | 0.532  | 27.417 | 19.373 | 2.835  | 18.99  |        |
| 144 ADCK4             | aarF domain containing kinase 4                                                           | 79934        | 79934 hCG1995823.1           | Hs.130712    | -2.691 | -2.374 | 0.317  | 27.417 | 19.039 | -1.509 | 18.887 |        |
| 145 SFTPA1            | surfactant, pulmonary-associated protein A1                                               | 6435         | 6435 hCG2025128              | Hs.465126    | 2.69   | 2.157  | 0.533  | 28.331 | 19.538 | 12.129 | 18.99  |        |
| 146 LOC284591         | null                                                                                      | 284591       | 284591 hCG2038553 hCG1995881 | Hs.133183    | -2.688 | -2.368 | 0.321  | 28.331 | 19.405 | -1.836 | 18.887 |        |
| 147 MGC33657          | null                                                                                      | 200373       | 200373 hCG1804625.3          | null         | 2.688  | 2.154  | 0.534  | 28.331 | 19.273 | 1.537  | 18.99  |        |
| 148 SLC11A1           | solute carrier family 11 (proton-coupled divalent metal ion transporters), member 1       | 6556         | 6556 hCG16301.2              | Hs.471393    | 2.685  | 2.151  | 0.534  | 28.331 | 19.123 | 2.717  | 18.99  |        |
| 149 SSTR2             | somatostatin receptor 2                                                                   | 6752         | 6752 hCG1641438.1            | Hs.514451    | -2.684 | -2.361 | 0.323  | 28.331 | 19.014 | -2.298 | 18.887 |        |
| 150 null              | null                                                                                      | hCG1996962   | null                         | hCG1996962   | -2.684 | -2.355 | 0.328  | 28.331 | 18.887 | -1.941 | 18.887 |        |
| 151 MYH9              | myosin, heavy polypeptide 9, non-muscle                                                   | 4627         | 4627 hCG41454.3              | Hs.474751    | 2.682  | 2.147  | 0.535  | 29.245 | 19.367 | 2.033  | 18.99  |        |
| 152 BHLHB2            | basic helix-loop-helix domain containing, class B, 2                                      | 8553         | 8553 hCG20358.2              | Hs.171825    | 2.682  | 2.145  | 0.538  | 29.245 | 19.24  | 2.132  | 18.99  |        |
| 153 GATA6             | GATA binding protein 6                                                                    | 2627         | 2627 hCG37191.2              | Hs.514746    | 2.682  | 2.141  | 0.541  | 29.245 | 19.114 | 4.338  | 18.99  |        |
| 154 null              | null                                                                                      | hCG1820902.1 | null                         | hCG1820902.1 | 2.673  | 2.138  | 0.535  | 29.245 | 18.99  | 1.913  | 18.99  |        |
| 155 FLJ22688          | null                                                                                      | 80199        | 80199 hCG21121.3             | Hs.288800    | -2.666 | -2.35  | 0.316  | 30.158 | 19.457 | -1.903 | 19.457 |        |
| 156 C1orf116          | chromosome 1 open reading frame 116                                                       | 79098        | 79098 hCG1723946.2           | Hs.32417     | 2.665  | 2.135  | 0.53   | 30.158 | 19.332 | 5.578  | 19.209 |        |
| 157 GLS               | glutaminase                                                                               | 2744         | 2744 hCG25795.2              | Hs.116448    | 2.664  | 2.132  | 0.532  | 30.158 | 19.209 | 1.739  | 19.209 |        |
| 158 ZFYVE1            | zinc finger, FYVE domain containing 1                                                     | 53349        | 53349 hCG21522.3             | Hs.335106    | -2.656 | -2.343 | 0.313  | 31.072 | 19.666 | -1.398 | 19.666 |        |
| 159 NAPSA             | napsin A aspartic peptidase                                                               | 9476         | 9476 hCG22926.2              | Hs.512843    | 2.655  | 2.129  | 0.525  | 31.072 | 19.542 | 3.232  | 19.542 |        |
| 160 TTTY15            | testis-specific transcript, Y-linked 15                                                   | 64595        | 64595 hCG2040553 hCG2039064  | Hs.433656    | 2.651  | 2.126  | 0.525  | 31.986 | 19.991 | 6.304  | 19.745 |        |
| 161 DDX20             | DEAD (Asp-Glu-Ala-Asp) box polypeptide 20                                                 | 11218        | 11218 hCG38167.3             | Hs.485810    | -2.649 | -2.337 | 0.311  | 31.986 | 19.867 | -1.735 | 19.867 |        |
| 162 NFKBIZ            | nuclear factor of kappa light polypeptide gene enhancer in B-cells inhibitor, zeta        | 64332        | 64332 hCG38701.5             | Hs.319171    | 2.648  | 2.124  | 0.524  | 31.986 | 19.745 | 2.464  | 19.745 |        |
| 163 AP2B1             | adaptor-related protein complex 2, beta 1 subunit                                         | 163          | 163 hCG1992160               | Hs.514819    | -2.644 | -2.331 | 0.313  | 32.9   | 20.184 | -1.489 | 19.939 |        |
| 164 VPS16             | vacuolar protein sorting 16 (yeast)                                                       | 64601        | 64601 hCG2039972             | Hs.269577    | -2.643 | -2.325 | 0.318  | 32.9   | 20.061 | -1.523 | 19.939 |        |
| 165 CENPH             | centromere protein H                                                                      | 64946        | 64946 hCG27171.3             | Hs.200395    | -2.639 | -2.32  | 0.32   | 32.9   | 19.939 | -2.103 | 19.939 |        |
| 166 KIFC3             | kinesin family member C3                                                                  | 3801         | 3801 hCG1795607.2            | Hs.23131     | 2.638  | 2.121  | 0.517  | 32.9   | 19.819 | 2.75   | 19.819 |        |
| 167 MAP3K5            | mitogen-activated protein kinase kinase kinase 5                                          | 4217         | 4217 hCG33356.3              | Hs.186486    | 2.637  | 2.118  | 0.519  | 33.814 | 20.248 | 2.292  | 20.248 |        |
| 168 null              | null                                                                                      | hCG1650256.3 | null                         | hCG1650256.3 | -2.632 | -2.314 | 0.318  | 33.814 | 20.127 | -1.763 | 20.074 |        |
| 169 PPM1G             | protein phosphatase 1G (formerly 2C), magnesium-dependent, gamma isoform                  | 5496         | 5496 hCG21229.3              | Hs.17883     | -2.631 | -2.309 | 0.322  | 34.728 | 20.549 | -1.741 | 20.074 |        |
| 170 AMH               | anti-Mullerian hormone                                                                    | 268          | 268 hCG2039529               | Hs.112432    | -2.63  | -2.304 | 0.326  | 34.728 | 20.428 | -2.64  | 20.074 |        |
| 171 PPT2              | palmitoyl-protein thioesterase 2                                                          | 9374         | 9374 hCG1999928.1            | Hs.332138    | -2.629 | -2.298 | 0.331  | 34.728 | 20.309 | -1.557 | 20.074 |        |
| 172 SYT11             | synaptotagmin XI                                                                          | 23208        | 23208 hCG17193.3             | Hs.32984     | -2.629 | -2.293 | 0.336  | 34.728 | 20.191 | -2.212 | 20.074 |        |
| 173 FKSG14            | null                                                                                      | 64105        | 64105 hCG1747136.3           | Hs.529778    | -2.629 | -2.289 | 0.34   | 34.728 | 20.074 | -2.35  | 20.074 |        |
| 174 CD69              | CD69 antigen (p60, early T-cell activation antigen)                                       | 969          | 969 hCG38142.3               | Hs.208854    | 2.618  | 2.115  | 0.503  | 36.556 | 21.009 | 3.137  | 20.889 |        |
| 175 CYorf15B          | chromosome Y open reading frame 15B                                                       | 84663        | 84663 hCG1987333             | Hs.145010    | 2.616  | 2.112  | 0.504  | 36.556 | 20.889 | 6.819  | 20.889 |        |
| 176 LNPEP             | leucyl/cystinyl aminopeptidase                                                            | 4012         | 4012 hCG1735557.1            | Hs.554761    | -2.606 | -2.284 | 0.323  | 37.47  | 21.29  | -1.561 | 21.206 |        |
| 177 ETV5              | ets variant gene 5 (ets-related molecule)                                                 | 2119         | 2119 null                    | Hs.43697     | 2.601  | 2.11   | 0.492  | 38.383 | 21.686 | 1.919  | 21.474 |        |
| 178 null              | null                                                                                      | hCG2024913   | null                         | hCG2024913   | 2.601  | 2.107  | 0.494  | 38.383 | 21.564 | 1.907  | 21.474 |        |
| 179 KIAA0664          | KIAA0664                                                                                  | 23277        | 23277 hCG32976.4             | Hs.22616     | -2.601 | -2.279 | 0.322  | 38.383 | 21.443 | -1.899 | 21.206 |        |
| 180 RAD54L            | RAD54-like (S. cerevisiae)                                                                | 8438         | 8438 hCG22090.2              | Hs.523220    | -2.6   | -2.274 | 0.326  | 38.383 | 21.324 | -2.275 | 21.206 |        |
| 181 MGC33648          | null                                                                                      | 133383       | 133383 hCG40616.3            | Hs.85950     | -2.599 | -2.269 | 0.33   | 38.383 | 21.206 | -2.11  | 21.206 |        |
| 182 ITPR1             | inositol 1,4,5-triphosphate receptor, type 1                                              | 3708         | 3708 hCG21731.2              | Hs.567295    | 2.59   | 2.104  | 0.486  | 39.297 | 21.592 | 2.164  | 21.474 |        |
| 183 CXCL1             | chemokine (C-X-C motif) ligand 1 (melanoma growth stimulating activity, alpha)            | 2919         | 2919 hCG16368.2              | Hs.789       | 2.59   | 2.101  | 0.489  | 39.297 | 21.474 | 2.206  | 21.474 |        |
| 184 CDH1              | cadherin 1, type 1, E-cadherin (epithelial)                                               | 999          | 999 hCG28201.2               | Hs.461086    | 2.584  | 2.099  | 0.485  | 40.211 | 21.854 | 6.424  | 21.854 |        |
| 185 STK11IP           | serine/threonine kinase 11 interacting protein                                            | 114790       | 114790 hCG16070.3            | Hs.22410     | -2.58  | -2.264 | 0.316  | 40.211 | 21.736 | -1.48  | 21.736 |        |
| 186 LRRK2             | leucine-rich repeat kinase 2                                                              | 120892       | 120892 hCG1775001.3          | Hs.187636    | 2.579  | 2.096  | 0.483  | 41.125 | 22.11  | 2.817  | 22.11  |        |
| 187 null              | null                                                                                      | hCG2016784   | null                         | Hs.453331    | 2.569  | 2.093  | 0.476  | 42.039 | 22.481 | 2.285  | 22.481 |        |
| 188 THOP1             | thimet oligopeptidase 1                                                                   | 7064         | 7064 hCG25247.3              | Hs.78769     | -2.565 | -2.259 | 0.306  | 42.953 | 22.847 | -1.981 | 22.726 |        |
| 189 PDZRN4            | PDZ domain containing RING finger 4                                                       | 29951        | 29951 hCG1997488             | Hs.380044    | -2.565 | -2.255 | 0.31   | 42.953 | 22.726 | -4.065 | 22.726 |        |
| 190 VIPR1             | vasoactive intestinal peptide receptor 1                                                  | 7433         | 7433 hCG28852.4              | Hs.348500    | 2.564  | 2.091  | 0.474  | 42.953 | 22.607 | 3.992  | 22.607 |        |
| 191 ARHGAP8 LOC553158 | Rho GTPase activating protein 8                                                           | 23779        | 23779 553158                 | null         | 2.559  | 2.088  | 0.471  | 43.867 | 22.967 | 3.66   | 22.612 |        |
| 192 HIST1H4A          | histone 1, H4a                                                                            | 8359         | 8359 hCG1643898.2            | Hs.248178    | -2.557 | -2.25  | 0.307  | 43.867 | 22.847 | -2.151 | 22.847 |        |
| 193 BTG2              | BTG family, member 2                                                                      | 7832         | 7832 hCG1640923.2            | Hs.519162    | 2.556  | 2.085  | 0.471  | 43.867 | 22.729 | 2.426  | 22.612 |        |
| 194 DIP               | null                                                                                      | 23151        | 23151 hCG41796.3             | Hs.475150    | 2.556  | 2.082  | 0.474  | 43.867 | 22.612 | 1.825  | 22.612 |        |
| 195 ANKRD13B          | ankyrin repeat domain 13B                                                                 | 124930       | 124930 hCG29086.2            | Hs.334715    | -2.541 | -2.246 | 0.295  | 46.609 | 23.902 | -1.969 | 23.488 |        |

|     |                     |                                                                                               |              |               |              |                     |        |        |       |        |        |        |        |
|-----|---------------------|-----------------------------------------------------------------------------------------------|--------------|---------------|--------------|---------------------|--------|--------|-------|--------|--------|--------|--------|
| 196 | null                | null                                                                                          | hCG1645220.1 | null          | hCG1645220.1 | null                | -2.538 | -2.242 | 0.296 | 46.609 | 23.78  | -2.52  | 23.488 |
| 197 | ATRX                | alpha thalassemia/mental retardation syndrome X-linked (RAD54 homolog, <i>S. cerevisiae</i> ) | 546          | 546           | hCG20035.4   | Hs.533526 Hs.571758 | 2.536  | 2.079  | 0.457 | 47.522 | 24.123 | 1.92   | 23.513 |
| 198 | MIDN                | midnolin                                                                                      | 90007        | 90007         | hCG21588.3   | Hs.465529           | 2.536  | 2.077  | 0.459 | 47.522 | 24.001 | 1.825  | 23.513 |
| 199 | LOC400506           | null                                                                                          | 400506       | 400506        | hCG38020.2   | Hs.300404           | -2.535 | -2.238 | 0.297 | 47.522 | 23.881 | -1.642 | 23.488 |
| 200 | LOC148413 LOC440746 | null                                                                                          | 440746       | 148413 440746 | hCG20425.3   | Hs.529943 Hs.515698 | -2.534 | -2.234 | 0.3   | 47.522 | 23.761 | -1.532 | 23.488 |
| 201 | STC1                | stanniocalcin 1                                                                               | 6781         | 6781          | hCG16685.3   | Hs.25590            | 2.532  | 2.074  | 0.458 | 48.436 | 24.098 | 2.116  | 23.513 |
| 202 | TIMM44              | translocase of inner mitochondrial membrane 44 homolog (yeast)                                | 10469        | 10469         | hCG22555.3   | Hs.465784           | -2.529 | -2.23  | 0.3   | 48.436 | 23.978 | -1.55  | 23.488 |
| 203 | null                | null                                                                                          | hCG1994865   | null          | hCG1994865   | Hs.533526           | 2.529  | 2.071  | 0.457 | 48.436 | 23.86  | 1.833  | 23.513 |
| 204 | null                | null                                                                                          | hCG1778862.2 | null          | hCG1778862.2 | null                | -2.527 | -2.226 | 0.301 | 48.436 | 23.743 | -1.688 | 23.488 |
| 205 | LOC131873           | null                                                                                          | 131873       | 131873        | null         | Hs.477571           | 2.527  | 2.069  | 0.458 | 48.436 | 23.627 | 4.484  | 23.513 |
| 206 | ZFP36               | zinc finger protein 36, C3H type, homolog (mouse)                                             | 7538         | 7538          | hCG43352.3   | Hs.534052           | 2.526  | 2.066  | 0.459 | 48.436 | 23.513 | 2.709  | 23.513 |
| 207 | FOXD1               | forkhead box D1                                                                               | 2297         | 2297          | hCG37843.4   | Hs.519385           | -2.521 | -2.221 | 0.3   | 49.35  | 23.841 | -3.298 | 23.488 |
| 208 | null                | null                                                                                          | hCG1774273.1 | null          | hCG1774273.1 | null                | -2.521 | -2.217 | 0.304 | 50.264 | 24.165 | -1.905 | 23.488 |
| 209 | FLJ36032            | null                                                                                          | 284485       | 284485        | hCG16929.3   | Hs.297967           | -2.52  | -2.213 | 0.307 | 50.264 | 24.05  | -1.892 | 23.488 |
| 210 | JUNB                | jun B proto-oncogene                                                                          | 3726         | 3726          | hCG172481.3  | Hs.25292            | 2.519  | 2.064  | 0.455 | 50.264 | 23.935 | 2.308  | 23.822 |
| 211 | PERP                | PERP, TP53 apoptosis effector                                                                 | 64065        | 64065         | hCG17829.4   | Hs.520421           | 2.519  | 2.061  | 0.458 | 50.264 | 23.822 | 2.395  | 23.822 |

**Supplementary Figure 1.** Unsupervised hierarchical clustering of all tumours based on the top-210 significant genes differentially expressed between metastases and primary tumours, identified by SAM analysis (Namløs et al.)

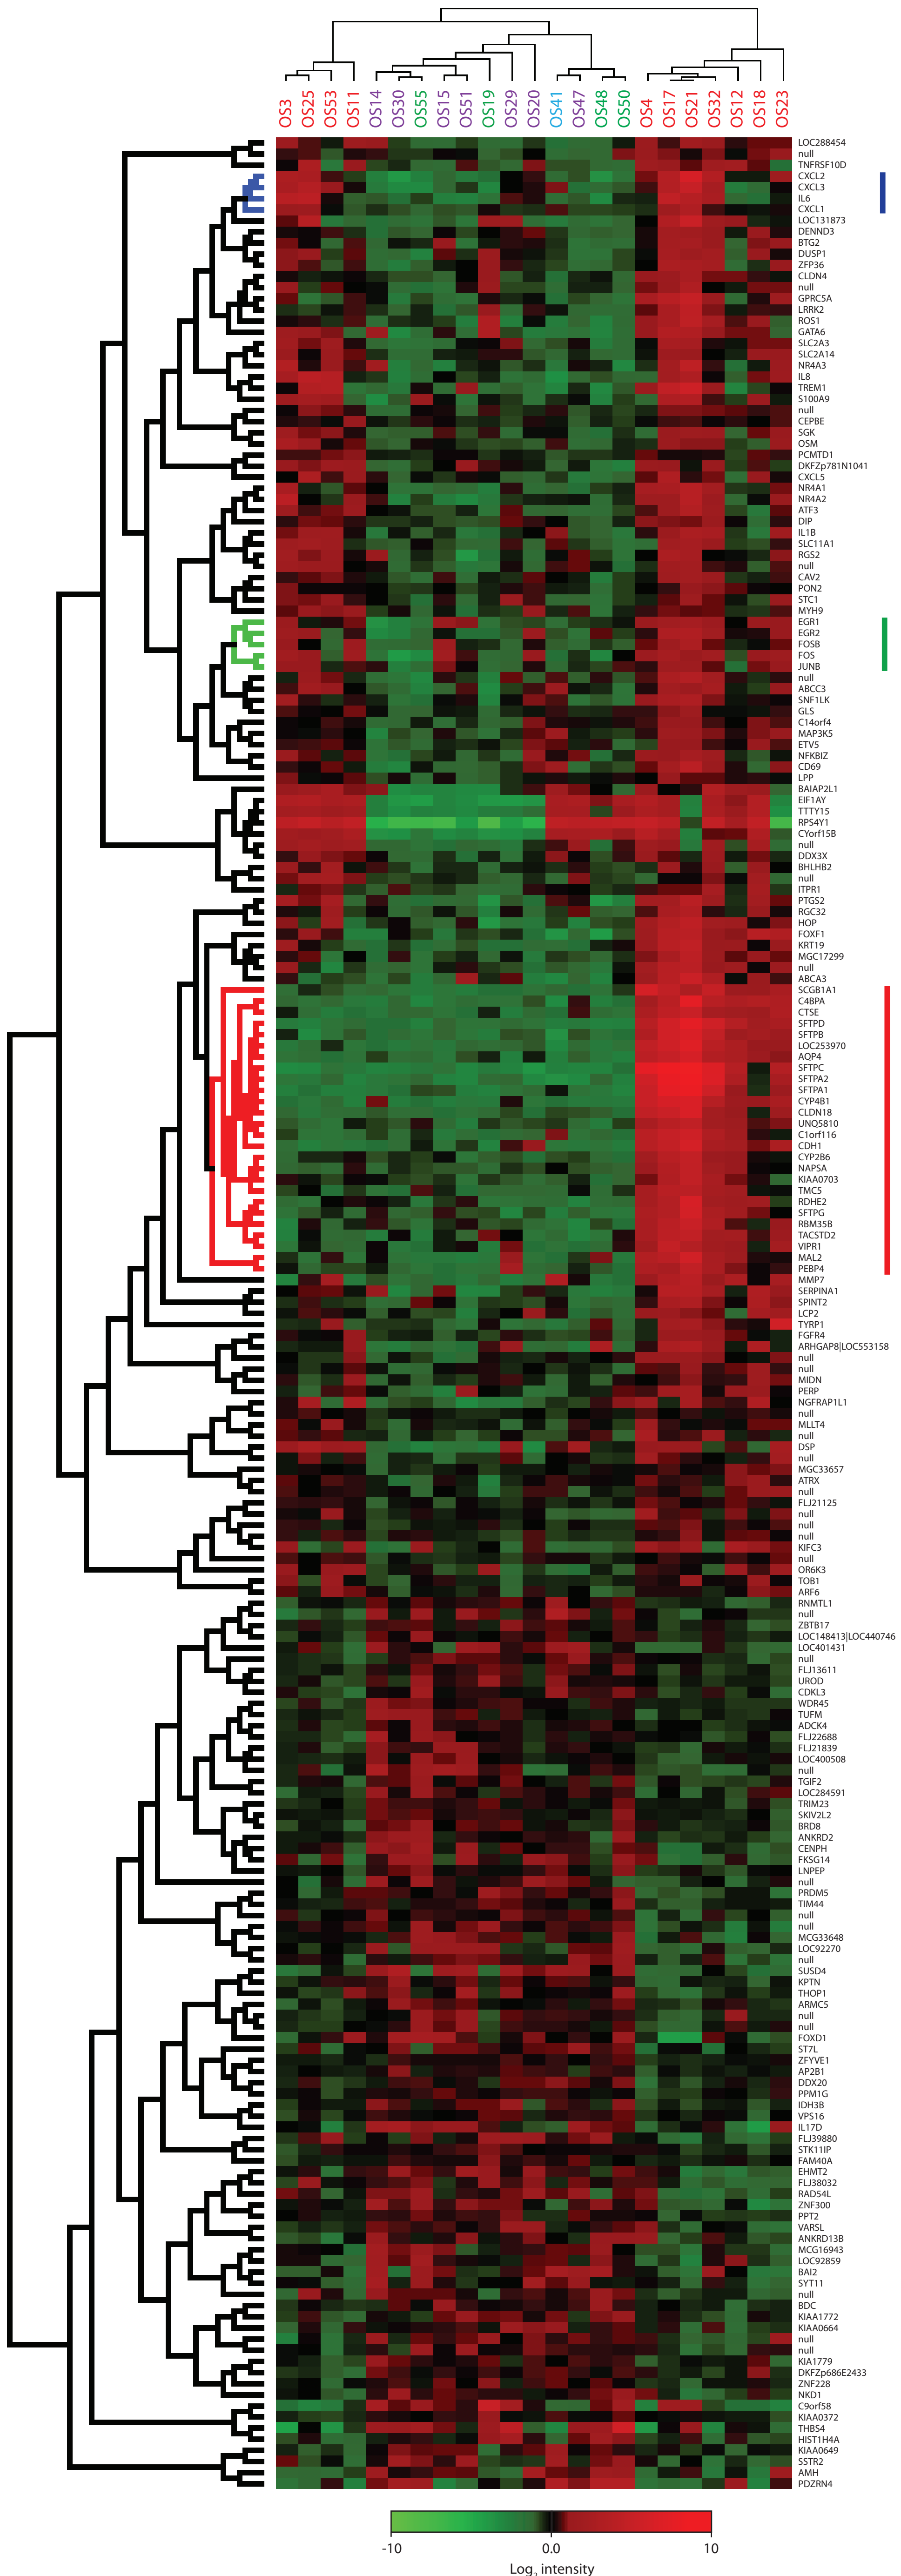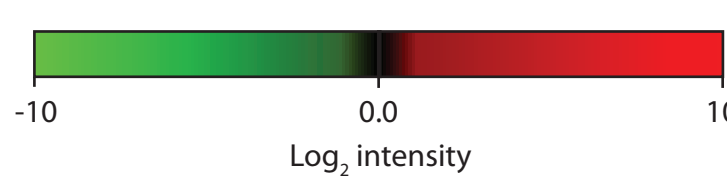

Supplement: 639038.f1.pdf [file 639038.f1.pdf]
